# Supplementary material for: Pre-Exposure Prophylaxis Interventions among Black Sexual Minority Men: A Systematic Literature Review
Source: MDPI journal article supplement (doi:10.3390/ijerph19041934), 2022-02-09
Supplement: s1 [file s1]

| Supplement 1. Bias assessment for included studies using JBI-MASTARI instruments (n=10).                                                                                                                                                                                                                                                                                                                                                                                                                                                                                                                                                                                                                                                                                                                                                                                                                                                                                                                                                                                                                                                                                                                                                                                                                                                                                                                                                                                                                                                                                                                                                                                                                                                                                                                                                                                  |    |    |    |    |    |    |    |    |    |     |     |     |     |
|---------------------------------------------------------------------------------------------------------------------------------------------------------------------------------------------------------------------------------------------------------------------------------------------------------------------------------------------------------------------------------------------------------------------------------------------------------------------------------------------------------------------------------------------------------------------------------------------------------------------------------------------------------------------------------------------------------------------------------------------------------------------------------------------------------------------------------------------------------------------------------------------------------------------------------------------------------------------------------------------------------------------------------------------------------------------------------------------------------------------------------------------------------------------------------------------------------------------------------------------------------------------------------------------------------------------------------------------------------------------------------------------------------------------------------------------------------------------------------------------------------------------------------------------------------------------------------------------------------------------------------------------------------------------------------------------------------------------------------------------------------------------------------------------------------------------------------------------------------------------------|----|----|----|----|----|----|----|----|----|-----|-----|-----|-----|
| Study Title                                                                                                                                                                                                                                                                                                                                                                                                                                                                                                                                                                                                                                                                                                                                                                                                                                                                                                                                                                                                                                                                                                                                                                                                                                                                                                                                                                                                                                                                                                                                                                                                                                                                                                                                                                                                                                                               | R1 | R2 | R3 | R4 | R5 | R6 | R7 | R8 | R9 | R10 | R11 | R12 | R13 |
| Adherence to Pre-exposure Prophylaxis in Black Men Who Have Sex with Men and Transgender Women in a Community Setting in Harlem, NY                                                                                                                                                                                                                                                                                                                                                                                                                                                                                                                                                                                                                                                                                                                                                                                                                                                                                                                                                                                                                                                                                                                                                                                                                                                                                                                                                                                                                                                                                                                                                                                                                                                                                                                                       | Y  | Y  | Y  | Y  | Y  | Y  | Y  | N  | Y  | Y   | Y   | Y   | Y   |
| A Pragmatic Randomized Controlled Trial to Increase PrEP Uptake for HIV Prevention: 55 Week Results From PrEP Chicago                                                                                                                                                                                                                                                                                                                                                                                                                                                                                                                                                                                                                                                                                                                                                                                                                                                                                                                                                                                                                                                                                                                                                                                                                                                                                                                                                                                                                                                                                                                                                                                                                                                                                                                                                     | Y  | Y  | Y  | Y  | Y  | Y  | Y  | N  | Y  | Y   | Y   | Y   | Y   |
| A Randomized Controlled Pilot Study of a Culturally-Tailored Counseling Intervention to Increase Uptake of HIV Pre-exposure Prophylaxis Among Young BSMM in DC                                                                                                                                                                                                                                                                                                                                                                                                                                                                                                                                                                                                                                                                                                                                                                                                                                                                                                                                                                                                                                                                                                                                                                                                                                                                                                                                                                                                                                                                                                                                                                                                                                                                                                            | Y  | Y  | N  | Y  | Y  | Y  | Y  | N  | Y  | Y   | Y   | Y   | Y   |
| Embedding a Linkage to Preexposure Prophylaxis Care Intervention in Social Network Strategy and Partner Notification Services: Results from a Pilot RCT                                                                                                                                                                                                                                                                                                                                                                                                                                                                                                                                                                                                                                                                                                                                                                                                                                                                                                                                                                                                                                                                                                                                                                                                                                                                                                                                                                                                                                                                                                                                                                                                                                                                                                                   | Y  | Y  | Y  | Y  | Y  | Y  | Y  | N  | Y  | Y   | Y   | Y   | Y   |
| Sex, PrEP, and Stigma: Experiences with HIV Pre-exposure Prophylaxis Among New York City MSM Participating in the HPTN 067/ADAPT Study                                                                                                                                                                                                                                                                                                                                                                                                                                                                                                                                                                                                                                                                                                                                                                                                                                                                                                                                                                                                                                                                                                                                                                                                                                                                                                                                                                                                                                                                                                                                                                                                                                                                                                                                    | Y  | Y  | Y  | Y  | Y  | Y  | Y  | N  | Y  | Y   | Y   | Y   | Y   |
| Small Randomized Controlled Trial of the New Passport to Wellness HIV Prevention Intervention for Black Men Who Have Sex with Men (BMSM)                                                                                                                                                                                                                                                                                                                                                                                                                                                                                                                                                                                                                                                                                                                                                                                                                                                                                                                                                                                                                                                                                                                                                                                                                                                                                                                                                                                                                                                                                                                                                                                                                                                                                                                                  | Y  | Y  | N  | Y  | Y  | Y  | Y  | N  | Y  | Y   | Y   | Y   | Y   |
| Integrated Next Step Counseling (iNSC) for Sexual Health and PrEP Use Among Young Men Who Have Sex with Men: Implementation and Observations from ATN110/113                                                                                                                                                                                                                                                                                                                                                                                                                                                                                                                                                                                                                                                                                                                                                                                                                                                                                                                                                                                                                                                                                                                                                                                                                                                                                                                                                                                                                                                                                                                                                                                                                                                                                                              | Y  | Y  | Y  | Y  | Y  | Y  | Y  | N  | Y  | Y   | Y   | Y   | Y   |
| Study Title                                                                                                                                                                                                                                                                                                                                                                                                                                                                                                                                                                                                                                                                                                                                                                                                                                                                                                                                                                                                                                                                                                                                                                                                                                                                                                                                                                                                                                                                                                                                                                                                                                                                                                                                                                                                                                                               | Q1 | Q2 | Q3 | Q4 | Q5 | Q6 | Q7 | Q8 | Q9 |     |     |     |     |
| Social network intervention to increase pre-exposure prophylaxis (PrEP) awareness, interest, and use among African American men who have sex with men                                                                                                                                                                                                                                                                                                                                                                                                                                                                                                                                                                                                                                                                                                                                                                                                                                                                                                                                                                                                                                                                                                                                                                                                                                                                                                                                                                                                                                                                                                                                                                                                                                                                                                                     | Y  | Y  | Y  | Y  | N  | Y  | Y  | Y  | Y  |     |     |     |     |
| Predictors of PrEP Uptake Among Patients with Equivalent Access                                                                                                                                                                                                                                                                                                                                                                                                                                                                                                                                                                                                                                                                                                                                                                                                                                                                                                                                                                                                                                                                                                                                                                                                                                                                                                                                                                                                                                                                                                                                                                                                                                                                                                                                                                                                           | Y  | Y  | Y  | N  | Y  | Y  | Y  | Y  | Y  |     |     |     |     |
| Pre-exposure prophylaxis initiation and adherence among Black men who have sex with men (MSM) in three US cities: results from the HPTN 073 study                                                                                                                                                                                                                                                                                                                                                                                                                                                                                                                                                                                                                                                                                                                                                                                                                                                                                                                                                                                                                                                                                                                                                                                                                                                                                                                                                                                                                                                                                                                                                                                                                                                                                                                         | Y  | Y  | Y  | N  | N  | Y  | Y  | Y  | Y  |     |     |     |     |
| Integrated Next Step Counseling (iNSC) for Sexual Health and PrEP Use Among Young Men Who Have Sex with Men: Implementation and Observations from ATN110/113                                                                                                                                                                                                                                                                                                                                                                                                                                                                                                                                                                                                                                                                                                                                                                                                                                                                                                                                                                                                                                                                                                                                                                                                                                                                                                                                                                                                                                                                                                                                                                                                                                                                                                              | Y  | Y  | Y  | N  | N  | Y  | Y  | Y  | Y  |     |     |     |     |
| <b>R1:</b> Was true randomization used for assignment of participants to treatment groups?<br><b>R2:</b> Was allocation to treatment groups concealed?<br><b>R3:</b> Were treatment groups similar at the baseline?<br><b>R4:</b> Were participants blind to treatment assignment?<br><b>R5:</b> Were those delivering treatment blind to treatment assignment?<br><b>R6:</b> Were outcomes assessors blind to treatment assignment?<br><b>R7:</b> Were treatment groups treated identically other than the intervention of interest?<br><b>R8:</b> Was follow up complete and if not, were differences between groups in terms of their follow up adequately described and analyzed?<br><b>R9:</b> Were participants analyzed in the groups to which they were randomized?<br><b>Q1:</b> Is it clear in the study what is the ‘cause’ and what is the ‘effect’ (i.e. there is no confusion about which variable comes first)?<br><b>Q2:</b> Were the participants included in any comparisons similar?<br><b>Q3:</b> Were the participants included in any comparisons receiving similar treatment/care, other than the exposure or intervention of interest?<br><b>Q4:</b> Was there a control group?<br><b>Q5:</b> Were there multiple measurements of the outcome both pre and post the intervention/exposure?<br><b>Q6:</b> Was follow up complete and if not, were differences between groups in terms of their follow up adequately described and analyzed?<br><b>R10/Q7:</b> Were outcomes measured in the same way between groups/timepoints?<br><b>R11/Q8:</b> Were outcomes measured in a reliable way?<br><b>R12/Q9:</b> Was appropriate statistical analysis used?<br><b>R13:</b> Was the trial design appropriate, and any deviations from the standard RCT design (randomization, parallel groups) accounted for in the conduct and analysis of the trial? |    |    |    |    |    |    |    |    |    |     |     |     |     |
